# Supplementary material for: No Loss, No Gain? COVID-19 school closures and Swiss fifth-graders' competencies and self-concept in mathematics
Source: Atypon-hosted journal article supplement (doi:10.1024/1010-0652/a000366), 2023-06-21
Supplement: 1010-0652_a000366_esm1.pdf [file 1010-0652_a000366_esm1.pdf]

## Electronic Supplementary Material 1

## Appendix A

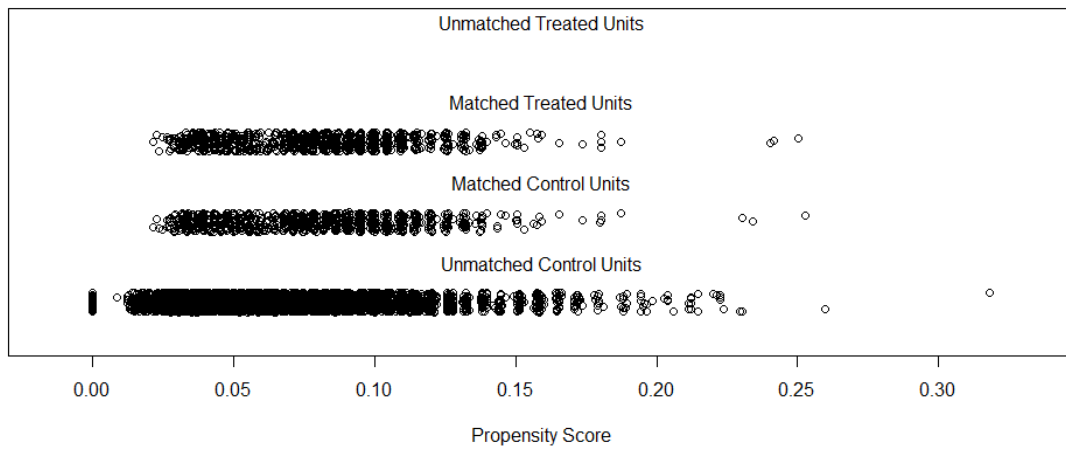

**Figure A.** Distribution of propensity scores.

Compagnoni, M., Rechsteiner, B., Grob, U., Bayer, N., Wullschleger, A. & Maag Merki, K. (2023). No Loss, No Gain? COVID-19 school closures and Swiss fifth-graders' competencies and self-concept in mathematics. *Zeitschrift für Pädagogische Psychologie*.

**Appendix B****Table B**

Math competencies in the main sample (2019/20) and the reference sample (2018/19) with data before matching

|       | Main sample (19/20) |       |       | Reference sample (18/19) |       |       | $d_{cohen}$ | $t$   | $df$  | $p$  |
|-------|---------------------|-------|-------|--------------------------|-------|-------|-------------|-------|-------|------|
|       | $n$                 | $M$   | $SD$  | $n$                      | $M$   | $SD$  |             |       |       |      |
| Total | 1193                | -.688 | 1.246 | 13030                    | -.809 | 1.267 | .096        | 3.177 | 14221 | .000 |

*Note.* To compute  $d_{cohen}$ , differences in group size were included;  $p$  = two-tailed.

**Appendix C****Table C**

Intra-class correlations for math self-concepts and math competencies

|                      | Variance components |                      | ICC (b/b+w) |      |         |            |            |
|----------------------|---------------------|----------------------|-------------|------|---------|------------|------------|
|                      | Variance within (w) | Variance between (b) | Estimate    | SD   | p-value | Lower 2.5% | Upper 2.5% |
| Self-concept t1      | .276                | .009                 | .032        | .016 | .000    | .011       | .075       |
| Self-concept t2      | .338                | .010                 | .030        | .017 | .000    | .008       | .073       |
| Self-concept t3      | .317                | .011                 | .035        | .021 | .000    | .006       | .084       |
| Math competencies t1 | 1.568               | .214                 | .117        | .024 | .000    | .076       | .172       |
| Math competencies t3 | 1.494               | .172                 | .102        | .027 | .000    | .070       | .177       |

*Note.* Self-concepts assessed as latent variables, math competencies as manifest variables.

## Appendix D

A prerequisite for analyzing constructs over different time points is to confirm measurement invariance. Confirmatory factor analyses with cluster-robust standard errors to control for multilevel data structure were conducted for math self-concept (see Table C for model indices). Assuming that identically formulated items correlated across the three measurement time points, generally in addition to the stability of the shared variance of the factors, and more strongly for shorter periods of time, we imposed model constraints so that the error correlations of closer measurement time points were equaled for each indicator. As  $\Delta\chi^2$  is sensitive to sample size  $> 100$ , both  $\Delta\chi^2$  and  $\Delta CFI$  were used as fit indices to compare model fit (Cheung & Rensvold, 2002). In a first model for all three measurement time points, the factors were configured from the same variables (configural measurement invariance). In the second model we imposed weak factorial measurement invariance by constraining the factor loadings to be invariant over time. Finding that weak factorial invariance held, we proceeded to test the third model (strong factorial invariance) in which we additionally constrained the intercepts to be invariant over time. In addition, we freed up the latent means from t2 onward to allow for mean change over time. This more restrictive model had a comparable model fit to model 1. Consequently, strong measurement invariance could be assumed for math self-concept. We performed the same stepwise invariance test for the subgroups (first language). Based on Cheung & Rensvold (2002), the  $\Delta CFI$  of  $-.006$  could be judged as not meaningful and strong factorial measurement invariance was assumed.

Cheung, G. W., & Rensvold, R. B. (2002). Evaluating goodness-of-fit indexes for testing measurement invariance. *Structural Equation Modeling, 9*(2), 233–255.

**Table D**

Measurement invariance (MI) of math self-concept over time and subgroups

| Models                                                                                                  | $\chi^2$ | df | SCF   | p    | RMSEA | CFI  | SRMR | S-B $\Delta\chi^2$ | p    |
|---------------------------------------------------------------------------------------------------------|----------|----|-------|------|-------|------|------|--------------------|------|
| <i>Math self-concept (n = 1,299)</i>                                                                    |          |    |       |      |       |      |      |                    |      |
| Configural MI                                                                                           | 23.297   | 18 | 1.141 | .179 | .015  | .999 | .012 |                    |      |
| Weak factorial MI                                                                                       | 27.857   | 22 | 1.125 | .181 | .014  | .999 | .022 | 4.518              | .340 |
| Strong factorial MI                                                                                     | 30.516   | 26 | 1.107 | .247 | .012  | .999 | .021 | 6.986              | .538 |
| <i>Model with subgroups: German as first language (n = 857), not German as first language (n = 407)</i> |          |    |       |      |       |      |      |                    |      |
| Configural MI                                                                                           | 47.146   | 42 | 1.115 | .270 | .014  | .999 | .018 |                    |      |
| Weak factorial MI (group)                                                                               | 55.328   | 51 | 1.107 | .315 | .012  | .999 | .049 | 8.115              | .523 |
| Weak factorial MI (group and time)                                                                      | 67.358   | 57 | 1.105 | .164 | .017  | .998 | .067 | 2.300              | .161 |
| Strong factorial MI (group)                                                                             | 74.646   | 64 | 1.089 | .171 | .016  | .998 | .070 | 27.634             | .188 |
| Strong factorial MI (group and time)                                                                    | 103.574  | 70 | 1.087 | .006 | .028  | .992 | .068 | 57.433             | .001 |

*Note.* Type = complex, cluster = class, SCF = scaling factor,  $\chi^2$  = chi-square, RMSEA = root mean square error of approximation, CFI = comparative fit index, SRMR = standardized root mean square residual, S-B  $\Delta\chi^2$  = Satorra-Bentler scaled delta chi-square.

**Appendix E**

M-Plus Syntax for RI-CLPM

```

TITLE:          RI-CLPM (basic model math competencies and math self-concepts)
DATA:          FILE IS Covid.dat;
              !LISTWISE = ON
VARIABLE:      NAMES ARE[...];
              USEVARIABLES ARE
              t1_MSC_1      t1_MSC_2      t1_MSC_3
              t2_MSC_1      t2_MSC_2      t2_MSC_3
              t3_MSC_1      t3_MSC_2      t3_MSC_3
              t1_Math      t3_Math;
              CLUSTER = class_id;
              MISSING = all (-99)
ANALYSIS:      type = complex;
              MODEL = NOCOV;
              *Auxiliary = (m) urbanity migratio eduparen firstlan gender age;
MODEL:         Mot1 by  t1_MSC_1      t1_MSC_2      t1_MSC_3 (L1 - L3);
              Mot2 by  t2_MSC_1      t2_MSC_2      t2_MSC_3 (L1 - L3);
              Mot3 by  t3_MSC_1      t3_MSC_2      t3_MSC_3 (L1 - L3);
              [t1_MSC_1      t1_MSC_2      t1_MSC_3] (i1-i3);
              [t2_MSC_1      t2_MSC_2      t2_MSC_3] (i1-i3);
              [t3_MSC_1      t3_MSC_2      t3_MSC_3] (i1-i3);
              [Mot2* Mot3*];
              t1_MSC_1 with t2_MSC_1 (a1);
              t1_MSC_2 with t2_MSC_2 (a2);
              t1_MSC_3 with t2_MSC_3 (a3);
              t2_MSC_1 with t3_MSC_1 (b1);
              t2_MSC_2 with t3_MSC_2 (b2);
              t2_MSC_3 with t3_MSC_3 (b3);
              t1_MSC_1 with t3_MSC_1 (c1);
              t1_MSC_2 with t3_MSC_2 (c2);
              t1_MSC_3 with t3_MSC_3 (c3);
              RIMot by Mot1@1 Mot2@1 Mot3@1;
              WMot1 by Mot1@1;
              WMot2 by Mot2@1;
              WMot3 by Mot3@1;
              Mot1@0;
              Mot2@0;
              Mot3@0;
              WMot2 on WMot1 (n);
              Wmot2 on t1_Math;
              WMot3 on WMot2 (m);
              t3_Math on t1_Math WMot2;
              RIMot with t3_Math t1_Math;
              t1_Math with WMot1;
              t3_Math with WMot3;
              RIMot with WMot1@0;

              Model Constraints:
              a1 = b1;
              a2 = b2;
              a3 = b3;
              !n = m;
OUTPUT:        TECH1 TECH4 STDYX SAMPSTAT CINTERVAL;

```

## Appendix F

Table F

Standardized parameter estimates of RI-CLPM for math competencies and math self-concept including auxiliary variables

|                                                   | EST   | CI 95 % |       | SE   | Two-tailed |         |
|---------------------------------------------------|-------|---------|-------|------|------------|---------|
|                                                   |       | lower   | upper |      | EST/SE     | p-value |
| Lagged effect State SC t1 - t2                    | .053  | -0.29   | .396  | .175 | .301       | .763    |
| Lagged effect State SC t2 - t3                    | .413  | .211    | .615  | .103 | 4.004      | .000    |
| Lagged effect Math t1 - t3                        | .684  | .648    | .721  | .019 | 36.721     | .000    |
| Cross-lagged effect State SC t2 on Math t1        | .158  | -.008   | .324  | .085 | 1.861      | .063    |
| Cross-lagged effect Math t3 on State SC t2        | .081  | .002    | .160  | .040 | 2.002      | .045    |
| Correlation Trait SC with Math t3                 | .225  | .155    | .295  | .036 | 6.282      | .000    |
| Correlation Trait SC with Math t1                 | .508  | .418    | .598  | .046 | 11.052     | .000    |
| Cross-sectional correlation State SC t1 with Math | -.118 | -.299   | .064  | .093 | -1.270     | .204    |
| Cross-sectional correlation State SC t3 with Math | .123  | .034    | .212  | .045 | 2.704      | .007    |

Note.  $N = 1,299$ ; SC = math self-concept, Math = math competencies, Model fit:  $\chi^2(38) = 55.925$ ,  $p < .031$ , RMSEA = .019, CFI = .997, SRMR = .023.

**Appendix G****Table G**

Multiple group RI-CLPM to test for differential effects based on children's first language

| Models                                                  | $\chi^2$ | <i>df</i> | SCF   | <i>p</i> | RMSEA | CFI  | SRMR | str. pos.<br>S-B $\Delta\chi^2$ | <i>p</i> |
|---------------------------------------------------------|----------|-----------|-------|----------|-------|------|------|---------------------------------|----------|
| <i>German first language (n = 857)</i>                  |          |           |       |          |       |      |      |                                 |          |
| <i>Not German first language (n = 407)</i>              |          |           |       |          |       |      |      |                                 |          |
| Multiple group RI-CLPM 1                                | 138.774  | 92        | 0.997 | .001     | .028  | .992 | .042 |                                 |          |
| Multiple-group RI-CLPM 2<br>(constrained <sup>a</sup> ) | 134.997  | 101       | 1.061 | .014     | .023  | .994 | .046 | 3.231                           | .954     |

Notes. *N* = 1,264, str. pos. S-B  $\Delta\chi^2$  = strictly positive Satorra-Bentler Chi2 Test (Asparouhov & Muthén, 2010); <sup>a</sup> all effects invariant across groups.

Asparouhov, T., & Muthén, B. (2010). Computing the strictly positive Satorra-Bentler chi-square test in Mplus. *Mplus Web Notes*, 12, 1-12.



## Appendix H

Table H

Standardized lagged, cross-lagged paths, and cross-sectional correlations for RI-CLPM with first language, gender, and age as covariates

| Parameter                                            | EST   | CI 95 % |       | SE   | EST/SE | Two-tailed      |
|------------------------------------------------------|-------|---------|-------|------|--------|-----------------|
|                                                      |       | low     | up    |      |        | <i>p</i> -value |
| Lagged effect State SC t1 - t2                       | .095  | -.310   | .499  | .206 | 0.459  | .646            |
| Lagged effect State SC t2 - t3                       | .434  | .209    | .660  | .115 | 3.773  | .000            |
| Lagged effect Math t1 - t3                           | .664  | .627    | .701  | .019 | 34.150 | .000            |
| Cross-lagged effect Math t1 - State SC t2            | .134  | -.036   | .305  | .087 | 1.548  | .122            |
| Cross-lagged effect State SC t2 - Math t3            | .074  | -.008   | .156  | .042 | 1.765  | .076            |
| Correlation Trait SC with Math t3                    | .228  | -.153   | .303  | .038 | 5.941  | .000            |
| Correlation Trait SC with Math t1                    | .496  | .390    | .585  | .054 | 9.175  | .000            |
| Cross-sectional correlation State SC t1 with Math t1 | -.112 | -.301   | .076  | .096 | -1.172 | .241            |
| Cross-sectional correlation State SC t3 with Math t3 | .118  | .031    | .205  | .044 | 2.668  | .008            |
| First language - Trait SC                            | -.014 | -.075   | .046  | .031 | -0.464 | .642            |
| First language - Math t1                             | .100  | .042    | .159  | .030 | 3.367  | .001            |
| First language - Math t3                             | .037  | -.008   | .082  | .023 | 1.592  | .111            |
| Gender - Trait SC                                    | .214  | .143    | .286  | .036 | 5.872  | .000            |
| Gender - Math t1                                     | .122  | .068    | .176  | .028 | 4.398  | .000            |
| Gender - Math t3                                     | .033  | -.010   | .076  | .022 | 1.490  | .136            |
| Age - Trait SC                                       | -.155 | -.231   | -.080 | .038 | -4.044 | .000            |
| Age - Math t1                                        | -.158 | -.211   | -.104 | .027 | -5.799 | .000            |
| Age - Math t3                                        | -.074 | -.110   | -.040 | .018 | -4.183 | .000            |

Note.  $N = 1,156$ ; SC = math self-concept, Math = math competencies, First language (1 = first language German, 2 = first language not German). Covariates were included as predictors of Trait SC, Math t1, and Math t3. Model fit:  $\chi^2(62) = 91.946$ ,  $p < .008$ , RMSEA = .020, CFI = .994, SRMR = .024.

## Appendix I

Table I 1

Comparison of RI-CLPMs with gender as time-invariant covariate (constant vs varying effect)

| Parameter                   | Unconditional |      |     |          | Gender (constant effect) |      |     |          | Gender (varying effect) |      |     |          |
|-----------------------------|---------------|------|-----|----------|--------------------------|------|-----|----------|-------------------------|------|-----|----------|
|                             | CI 95 %       |      |     |          | CI 95 %                  |      |     |          | CI 95 %                 |      |     |          |
|                             | EST           | low  | up  | <i>p</i> | EST                      | low  | up  | <i>p</i> | EST                     | low  | up  | <i>p</i> |
| <i>Lagged effects</i>       |               |      |     |          |                          |      |     |          |                         |      |     |          |
| State SC t1 - t2            | .06           | -.27 | .40 | .71      | .04                      | -.30 | .39 | .80      | .03                     | -.33 | .38 | .89      |
| State SC t2 - t3            | .42           | .22  | .62 | .00      | .41                      | .21  | .62 | .00      | .41                     | .21  | .61 | .00      |
| Math t1 - t3                | .68           | .65  | .72 | .00      | .68                      | .65  | .72 | .00      | .68                     | .65  | .72 | .00      |
| <i>Cross-lagged effects</i> |               |      |     |          |                          |      |     |          |                         |      |     |          |
| Math t1 - State SC t2       | .16           | -.01 | .32 | .06      | .16                      | -.01 | .33 | .06      | .14                     | -.04 | .31 | .12      |
| State SC t2 - Math t3       | .08           | .00  | .16 | .04      | .08                      | .00  | .16 | .04      | .08                     | .00  | .16 | .04      |
| <i>Correlations</i>         |               |      |     |          |                          |      |     |          |                         |      |     |          |
| Trait SC with Math t3       | .22           | .16  | .30 | .00      | .23                      | .16  | .30 | .00      | .23                     | .16  | .30 | .00      |
| Trait SC with Math t1       | .51           | .42  | .60 | .00      | .50                      | .41  | .59 | .00      | .51                     | .41  | .60 | .00      |
| State SC t1 with Math t1    | -.12          | -.30 | .06 | .19      | -.12                     | -.30 | .06 | .19      | -.14                    | -.32 | .05 | .15      |
| State SC t3 with Math t3    | .13           | .04  | .21 | .01      | .13                      | .04  | .21 | .01      | .12                     | .04  | .21 | .01      |

*Note.* *N* = 1,299; SC = math self-concept, Math = math competencies. Gender was included as predictor of Trait SC, State SC (constant vs varying effect), Math t1, and Math t3. All models fitted the data well. Standardized model results are reported.

**Table 1 2**

Comparison of RI-CLPMs with age as time-invariant covariate (constant vs varying effect)

| Parameter                   | Unconditional |      |     |          | Age (constant effect) |      |     |          | Age (varying effect) |      |     |          |
|-----------------------------|---------------|------|-----|----------|-----------------------|------|-----|----------|----------------------|------|-----|----------|
|                             | CI 95 %       |      |     |          | CI 95 %               |      |     |          | CI 95 %              |      |     |          |
|                             | EST           | low  | up  | <i>p</i> | EST                   | low  | up  | <i>p</i> | EST                  | low  | up  | <i>p</i> |
| <i>Lagged effects</i>       |               |      |     |          |                       |      |     |          |                      |      |     |          |
| State SC t1 - t2            | .06           | -.27 | .40 | .71      | .07                   | -.29 | .42 | .72      | .06                  | -.30 | .43 | .73      |
| State SC t2 - t3            | .42           | .22  | .62 | .00      | .41                   | .20  | .61 | .00      | .41                  | .20  | .61 | .00      |
| Math t1 - t3                | .68           | .65  | .72 | .00      | .67                   | .64  | .71 | .00      | .68                  | .64  | .71 | .00      |
| <i>Cross-lagged effects</i> |               |      |     |          |                       |      |     |          |                      |      |     |          |
| Math t1 - State SC t2       | .16           | -.01 | .32 | .06      | .15                   | -.02 | .32 | .09      | .14                  | -.03 | .32 | .10      |
| State SC t2 - Math t3       | .08           | .00  | .16 | .04      | .08                   | .00  | .16 | .05      | .08                  | .00  | .16 | .05      |
| <i>Correlations</i>         |               |      |     |          |                       |      |     |          |                      |      |     |          |
| Trait SC with Math t3       | .22           | .16  | .30 | .00      | .22                   | .15  | .30 | .00      | .22                  | .15  | .29 | .00      |
| Trait SC with Math t1       | .51           | .42  | .60 | .00      | .50                   | .41  | .60 | .00      | .50                  | .41  | .60 | .00      |
| State SC t1 with Math t1    | -.12          | -.30 | .06 | .19      | -.12                  | -.31 | .07 | .21      | -.12                 | -.31 | .07 | .20      |
| State SC t3 with Math t3    | .13           | .04  | .21 | .01      | .12                   | .03  | .21 | .01      | .12                  | .03  | .21 | .01      |

*Note.* *N* = 1,299, SC = math self-concept, Math = math competencies. Age was included as predictor of Trait SC, State SC (constant vs varying effect), Math t1, and Math t3; *N* = 1,170 for the models including time-invariant covariate. All models fitted the data well. Standardized model results are reported.

**Table 13**

Comparison of RI-CLPMs with first language as time-invariant covariate (constant vs varying effect)

| Parameter                   | Unconditional |      |     |          | First language<br>(constant effect) |      |     |          | First language<br>(varying effect) |      |     |          |
|-----------------------------|---------------|------|-----|----------|-------------------------------------|------|-----|----------|------------------------------------|------|-----|----------|
|                             | CI 95 %       |      |     |          | CI 95 %                             |      |     |          | CI 95 %                            |      |     |          |
|                             | EST           | low  | up  | <i>p</i> | EST                                 | low  | up  | <i>p</i> | EST                                | low  | up  | <i>p</i> |
| <i>Lagged effects</i>       |               |      |     |          |                                     |      |     |          |                                    |      |     |          |
| State SC t1 - t2            | .06           | -.27 | .40 | .71      | .10                                 | -.27 | .47 | .60      | .10                                | -.27 | .47 | .60      |
| State SC t2 - t3            | .42           | .22  | .62 | .00      | .44                                 | .23  | .65 | .00      | .45                                | .24  | .66 | .00      |
| Math t1 - t3                | .68           | .65  | .72 | .00      | .68                                 | .64  | .71 | .00      | .68                                | .64  | .72 | .00      |
| <i>Cross-lagged effects</i> |               |      |     |          |                                     |      |     |          |                                    |      |     |          |
| Math t1 - State SC t2       | .16           | -.01 | .32 | .06      | .13                                 | -.03 | .29 | .12      | .12                                | -.05 | .29 | .16      |
| State SC t2 - Math t3       | .08           | .00  | .16 | .04      | .08                                 | -.00 | .16 | .06      | .08                                | -.00 | .16 | .06      |
| <i>Correlations</i>         |               |      |     |          |                                     |      |     |          |                                    |      |     |          |
| Trait SC with Math t3       | .22           | .16  | .30 | .00      | .23                                 | .16  | .31 | .00      | .23                                | .16  | .31 | .00      |
| Trait SC with Math t1       | .51           | .42  | .60 | .00      | .52                                 | .42  | .62 | .00      | .52                                | .42  | .63 | .00      |
| State SC t1 with Math t1    | -.12          | -.30 | .06 | .19      | -.13                                | -.31 | .06 | .18      | -.14                               | -.33 | .06 | .18      |
| State SC t3 with Math t3    | .13           | .04  | .21 | .01      | .12                                 | .03  | .21 | .01      | .12                                | .03  | .21 | .01      |

*Note.*  $N = 1,299$ , SC = math self-concept, Math = math competencies. First language was included as predictor of Trait SC, State SC (constant vs varying effect), Math t1, and Math t3.  $N = 1,264$  for the models including time-invariant covariate. All models fitted the data well. Standardized model results are reported.
